# Supplementary material for: Variants in CDH23 Cause Broad Spectrum of Hearing Loss: From Non-Syndromic to Syndromic Hearing Loss as Well as From Congenital to Age-Related Hearing Loss
Source: Research Square preprint supplement (doi:10.21203/rs.3.rs-630480/v1), 2021-06-28
Supplement: Supplementary file 1 [file 3bd06e504e2d672374f8b62d.xlsx]

## Sheet: Sheet1
Table 2: Combinations of biallelic CDH23 variants detected and their hearing devices in this study
	Combination of biallelic variants on diagnostics (Amino acid Change/Nucleotide change)	Number of Cases	HA	CI/EAS	Not wearing	Unknown
Compound heterozygote	CDH23:p.[P240L];[R2029W]	30	5	6		19
Homozygote	CDH23:p.[P240L];[P240L]	28	10	6		12
Compound heterozygote	CDH23:p.[P240L];[E956K]	18	5	4		9
Compound heterozygote	CDH23:p.[P240L];[R1588W]	16	1	2		13
Homozygote	CDH23:p.[R1588W];[R1588W]	15		1		14
Compound heterozygote	CDH23:p.[P240L];[D1341N]	6	3			3
Compound heterozygote	CDH23:p.[P240L];[Q1716P]	4		1		3
Homozygote	CDH23:p.[R2029W];[R2029W]	4	2			2
Compound heterozygote	CDH23:p.[P240L];[R301Q]	3				3
Compound heterozygote	CDH23:p.[P240L];[E2438K]	3				3
Compound heterozygote	CDH23:p.[P240L];[N2287K]	3				3
Compound heterozygote	CDH23:p.[P240L];[R2488H]	3				3
Compound heterozygote	CDH23:p.[R269W];[R1588W]	3	1		1	1
Compound heterozygote	CDH23:p.[E956K];[R1588W]	3	1	1		1
Compound heterozygote	CDH23:p.[R1588W];[E2438K]	3				3
Compound heterozygote	CDH23:p.[Q1716P];[R2029W]	3				3
Compound heterozygote	CDH23:p.[P240L];[Y241D]	2	1			1
Compound heterozygote	CDH23:p.[P240L];[G1583S]	2	1			1
Compound heterozygote	CDH23:p.[P240L];[D2322E]	2	1			1
Compound heterozygote	CDH23:p.[P240L];[R2382Q]	2				2
Compound heterozygote	CDH23:p.[P240L];[L2441P]	2		1		1
Compound heterozygote	CDH23:p.[P240L];[F2509L]	2	1			1
Compound heterozygote	CDH23:p.[P240L];[R2793Q]	2				2
Compound heterozygote	CDH23:p.[P240L];[A2934Tfs*16]	2				2
Compound heterozygote	CDH23:p.[P240L];[V2996Cfs*38]	2		2
Compound heterozygote	CDH23:p.[E956K];[Y2471C]	2				2
Compound heterozygote	CDH23:p.[D1341N];[R1588W]	2				2
Compound heterozygote	CDH23:p.[R1502X];[R2488H]	2	1			1
Compound heterozygote	CDH23:p.[R1588W];[V1711I]	2			1	1
Compound heterozygote	CDH23:p.D1626A;c.5820+5G>T	2		2
Compound heterozygote	CDH23:p.[R1746Q];[V2996G]	2	1			1
Compound heterozygote	CDH23:p.[L1986P];[R2029W]	2				2
Compound heterozygote	CDH23:p.[R2029W];[D2202E]	2		2
Compound heterozygote	CDH23:p.[R2029W];[R2488H]	2	1			1
Compound heterozygote	CDH23:p.[L2544V];[A2753T]	2				2
Compound heterozygote	CDH23:p.[G112R];[G705_Q706insREYG]	1				1
Compound heterozygote	CDH23:p.[D160N];[P240L]	1				1
Compound heterozygote	CDH23:p.[D160N];[R1588W]	1				1
Compound heterozygote	CDH23:p.[D160N];[R2488H]	1				1
Compound heterozygote	CDH23:p.[D231E];[P240L]	1				1
Compound heterozygote	CDH23:p. P240L;c.336+1G>A	1		1
Compound heterozygote	CDH23:p.[P240L];[N281S]	1		1
Compound heterozygote	CDH23:p.[P240L];[R301W]	1		1
Compound heterozygote	CDH23:p.[P240L];[E302Rfs*11]	1				1
Compound heterozygote	CDH23:p.[P240L];[I448F]	1				1
Compound heterozygote	CDH23:p.[P240L];[L508P]	1	1
Compound heterozygote	CDH23:p.[P240L];[T512M]	1		1
Compound heterozygote	CDH23:p.[P240L];[E541K]	1				1
Compound heterozygote	CDH23:p.[P240L];[I600Cfs*26]	1				1
Compound heterozygote	CDH23:p.P240L;c.1859-3C>A	1				1
Compound heterozygote	CDH23:p.[P240L];[P993R]	1				1
Compound heterozygote	CDH23:p.[P240L];[D1074N]	1		1
Compound heterozygote	CDH23:p.[P240L];[P1290Rfs*75]	1	1
Compound heterozygote	CDH23:p.[P240L];[T1368M]	1				1
Compound heterozygote	CDH23:p.[P240L];[S1424X]	1				1
Compound heterozygote	CDH23:p.[P240L];[G1558R]	1				1
Compound heterozygote	CDH23:p.[P240L];[E1595K]	1	1
Compound heterozygote	CDH23:p.[P240L];[R1916H]	1				1
Compound heterozygote	CDH23:p.[P240L];[P1932L]	1	1
Compound heterozygote	CDH23:p.[P240L];[R1939G]	1				1
Compound heterozygote	CDH23:p.P240L;c.5821-2A>G	1		1
Compound heterozygote	CDH23:p.[P240L];[N1953K]	1				1
Compound heterozygote	CDH23:p.P240L;c.7363-2A>C	1				1
Compound heterozygote	CDH23:p.[P240L];[Q2494H]	1				1
Compound heterozygote	CDH23:p.[P240L];[N2645D]	1				1
Compound heterozygote	CDH23:p.[P240L];[T2943M]	1				1
Compound heterozygote	CDH23:p.[P240L];[Q2993Q]	1				1
Compound heterozygote	CDH23:p.[P240L];[D3032N]	1				1
Compound heterozygote	CDH23:p.[P240L];[G3287S]	1				1
Compound heterozygote	CDH23:p.Y246X;c.4359+5G>A	1				1
Homozygote	CDH23:p.[R256C];[R256C]	1		1
Compound heterozygote	CDH23:p.[R269W];[P1932L]	1				1
Compound heterozygote	CDH23:p.[R269W];[R2029W]	1		1
Compound heterozygote	CDH23:p.[R269W];[A2870G]	1				1
Compound heterozygote	CDH23:p.[R269W];[R3043W]	1				1
Compound heterozygote	CDH23:p.[N281S];[I3028F]	1	1
Compound heterozygote	CDH23:p.[Y288X];[G2017S]	1				1
Compound heterozygote	CDH23:p.[Y389X];[R1588W]	1				1
Compound heterozygote	CDH23:p.[S401P];[G149S]	1	1
Compound heterozygote	CDH23:p.[E435K];[R1588W]	1				1
Compound heterozygote	CDH23:p.[T512M];[R1588W]	1	1
Homozygote	CDH23:p.[E524*];[E524*]	1		1
Compound heterozygote	CDH23:p.[G538R];[E956K]	1				1
Compound heterozygote	CDH23:p.[G705R];[D2790Gfs*37]	1	1
Compound heterozygote	CDH23:p.D773A;c.8064+1G>A	1	1
Compound heterozygote	CDH23:p.P776T;c.4359+5G>A	1				1
Compound heterozygote	CDH23:p.[E956K];[D2202N]	1	1
Compound heterozygote	CDH23:p.[E956K];[D2219N]	1				1
Compound heterozygote	CDH23:p.[E956K];[F2722L]	1				1
Compound heterozygote	CDH23:p.[E956K];[F2777S]	1				1
Compound heterozygote	CDH23:p.[R1081X];[R1588W]	1				1
Compound heterozygote	CDH23:c.3716-3C>G;p.R2029W	1				1
Compound heterozygote	CDH23:p.[N1293Tfs*72];[R1588W]	1				1
Homozygote	CDH23:c.[4206+5G>A];[4206+5G>A]	1		1
Compound heterozygote	CDH23:p.[D1341N];[Q1716P]	1	1
Compound heterozygote	CDH23:p.[A1443D];[E2438K]	1				1
Compound heterozygote	CDH23:p.[E1488G];[R2488H]	1	1
Compound heterozygote	CDH23:p.[L1495R];[R2029W]	1	1
Compound heterozygote	CDH23:p.[R1502X];[R2029W]	1				1
Compound heterozygote	CDH23:p.[G1583S];[R2029W]	1		1
Compound heterozygote	CDH23:p.[R1588W];[Q1716P]	1				1
Compound heterozygote	CDH23:p.[R1588W];[R1746Q]	1				1
Compound heterozygote	CDH23:p.[R1588W];[E1862K]	1	1
Compound heterozygote	CDH23:p.[R1588W];[P1957H]	1				1
Compound heterozygote	CDH23:p.R1588W;c.6050-9G>A	1				1
Compound heterozygote	CDH23:p.[R1588W];[R2029W]	1	1
Compound heterozygote	CDH23:p.[R1588W];[S2033X]	1				1
Compound heterozygote	CDH23:p.[R1588W];[R2107X]	1				1
Compound heterozygote	CDH23:p.[R1588W];[T2280Sfs*92]	1			1
Compound heterozygote	CDH23:p.[R1588W];[L2441P]	1				1
Compound heterozygote	CDH23:p.[R1588W];[L2473P]	1				1
Compound heterozygote	CDH23:p.[R1588W];[R2489H]	1	1
Compound heterozygote	CDH23:p.[R1588W];[F2664I]	1		1
Compound heterozygote	CDH23:p.[R2029W];[D2695N]	1				1
Compound heterozygote	CDH23:p.[R1588W];[F2777S]	1				1
Compound heterozygote	CDH23:p.[R1588W];[R2956S]	1				1
Compound heterozygote	CDH23:p.[R1588W];[N2981del]	1	1
Compound heterozygote	CDH23:p.[R1588W];[L3022P]	1				1
Compound heterozygote	CDH23:p.[R1588W];[S3157Rfs*58]	1				1
Compound heterozygote	CDH23:p.[E1595K];[E1862K]	1				1
Homozygote	CDH23:p.[T1618M];[T1618M]	1				1
Homozygote	CDH23:p.[G1757S];[G1757S]	1				1
Compound heterozygote	CDH23:p.S1927Cfs*16;c.5821-2A>G	1	1
Compound heterozygote	CDH23:p.[P1932L];[A2938Gfs*25]	1				1
Homozygote	CDH23:c.[5820+5G>T];[5820+5G>T]	1	1
Compound heterozygote	CDH23:p.[R2029W];[L2441P]	1				1
Compound heterozygote	CDH23:p.[R2029W];[T2584Qfs*70]	1	1
Compound heterozygote	CDH23:p.[R2029W];[R3043P]	1				1
Homozygote	CDH23:p.[N2282Tfs*91];[N2282Tfs*91]	1				1
Compound heterozygote	CDH23:p.[Y2301H];[R2489C]	1				1
Compound heterozygote	CDH23:p.[R2382Q];[R2382Q]	1	1
Compound heterozygote	CDH23:p.[E2438K];[T2751*]	1		1
Compound heterozygote	CDH23:p.[T2454T];[D2936G]	1				1
Compound heterozygote	CDH23:c[7363-2->G];[8064+1G>A]	1		1
Homozygote	CDH23:p.[R2489C];[R2489C]	1		1
Compound heterozygote	CDH23:p.[N2607I];[V2996G]	1				1
Homozygote	CDH23:p.[F2777S];[F2777S]	1				1
Compound heterozygote	CDH23:p.[A2870G];[R2935X]	1				1
Homozygote	CDH23:p.[A2938Gfs*25];[A2938Gfs*25]	1				1
Homozygote	CDH23:p.[D3032N];[D3032N]	1				1
Homozygote	CDH23:p.[L3133P];[L3133P]	1		1
	HA: hearing aid, CI: cochlear implant EAS :electric acoustic stimulation
